# Supplementary material for: Enhanced photocarriers separation of novel CdS/pt/Mo2C heterostructure for visible-light-driven hydrogen evolution
Source: Royal Society of Chemistry journal article supplement (doi:10.1039/c8ra05473h), 2018-01-01
Supplement: c8ra05473h1.pdf [file c8ra05473h1.pdf]

## Supplementary Information

### Enhanced Photocatalytic Activity of Novel CdS/Pt/Mo<sub>2</sub>C Heterostructure for Visible-Light-Driven Hydrogen Evolution

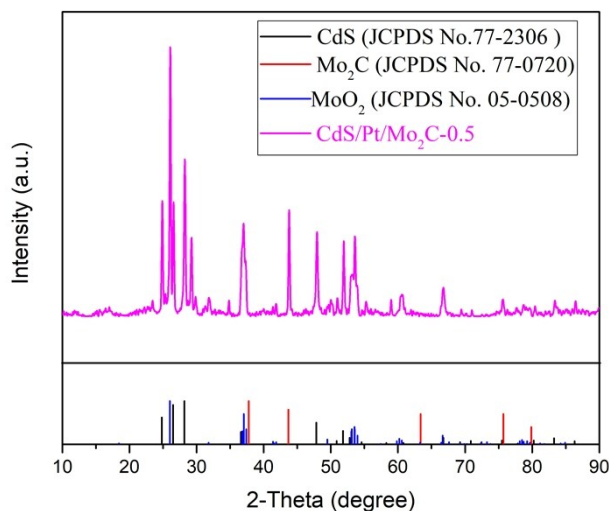

**Fig. S1** XRD patterns of CdS/Pt/Mo<sub>2</sub>C-0.5 samples.

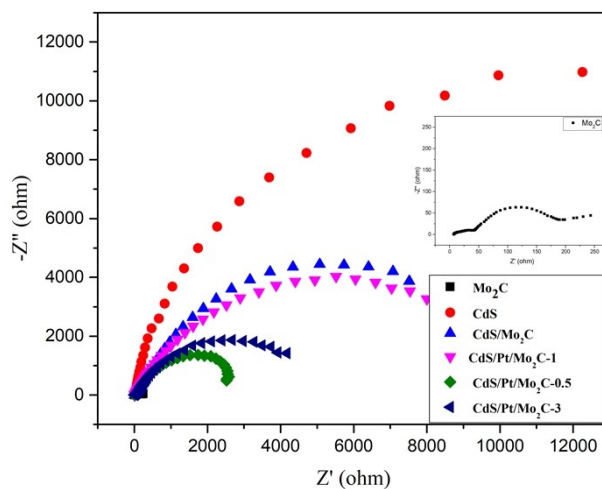

**Fig. S2** EIS Nyquist plots of CdS, Mo<sub>2</sub>C, CdS/Mo<sub>2</sub>C, CdS/Pt/Mo<sub>2</sub>C-0.5, CdS/Pt/Mo<sub>2</sub>C-1 and CdS/Pt/Mo<sub>2</sub>C-3 samples coated on ITO measured at 0.5 V vs. SCE in a 0.5 M Na<sub>2</sub>SO<sub>4</sub> aqueous solution

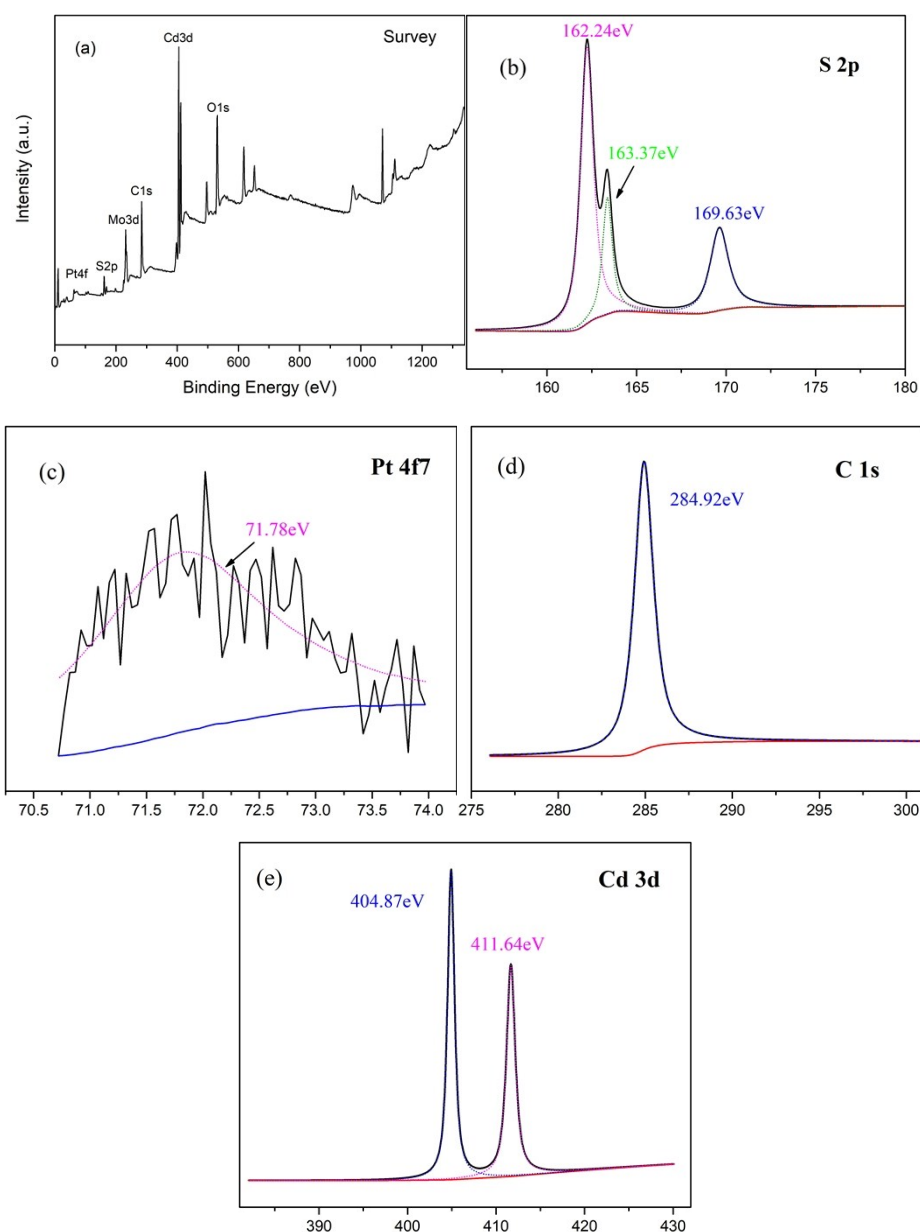

**Figure S3** XPS survey spectrum (a), high-resolution spectra of the S 2p (b), Pt 4f7 (c), C 1s (d) and Cd 3d (e) for the CdS/Pt/Mo<sub>2</sub>C-0.5 heterostructure system.

| samples                      | Pt (%) | S (%)  | Mo (%) | C (%)  | Cd (%) |
|------------------------------|--------|--------|--------|--------|--------|
| Mo <sub>2</sub> C            | 0      | 0      | 13.494 | 86.506 | 0      |
| CdS                          | 0      | 74.88  | 0      | 0      | 25.12  |
| CdS/Mo <sub>2</sub> C        | 0      | 10.861 | 7.583  | 72.087 | 9.469  |
| CdS/Pt/Mo <sub>2</sub> C-0.5 | 0.091  | 13.652 | 7.083  | 68.007 | 11.166 |
| CdS/Pt/Mo <sub>2</sub> C-1   | 0.135  | 12.025 | 5.935  | 71.331 | 10.574 |
| CdS/Pt/Mo <sub>2</sub> C-3   | 0.769  | 12.233 | 6.234  | 70.504 | 10.26  |

**Table S1.** The chemical composition of different samples measured by XPS

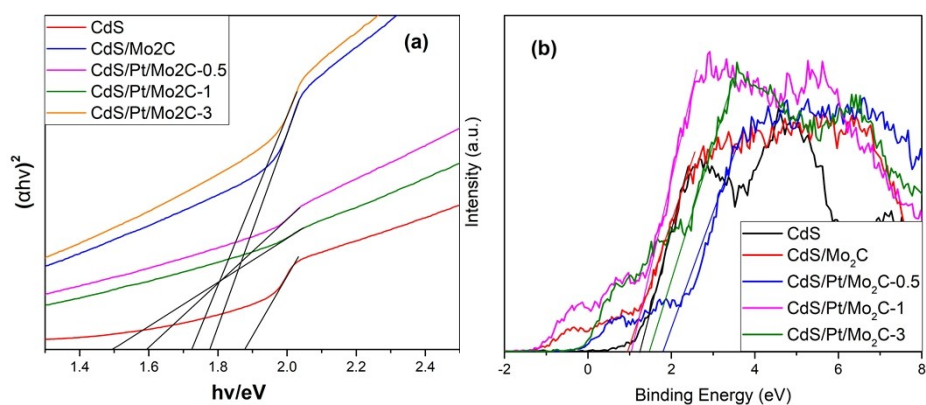

**Fig. S4** (a) Tauc plot curves of the different samples. (b) valence band spectra of CdS, CdS/Mo<sub>2</sub>C, CdS/Pt/Mo<sub>2</sub>C-0.5, CdS/Pt/Mo<sub>2</sub>C-1 and CdS/Pt/Mo<sub>2</sub>C-3.

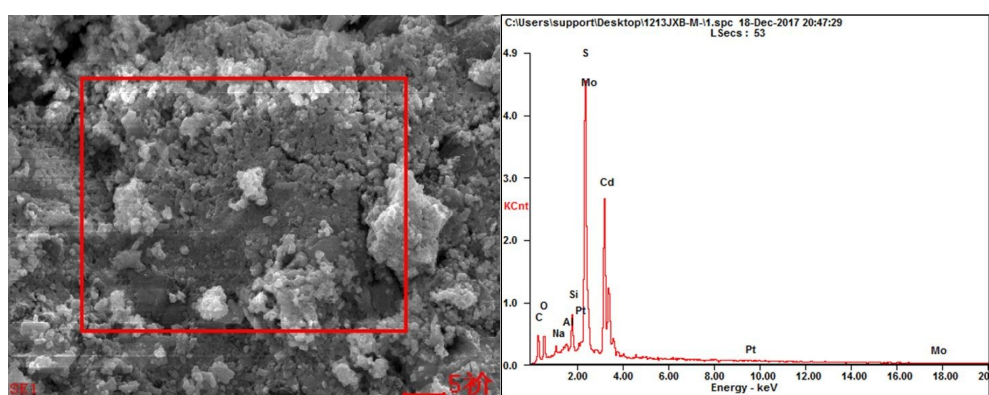

| Element | Wt%        | At%   |
|---------|------------|-------|
| CK      | 06.09      | 20.22 |
| OK      | 12.77      | 31.84 |
| NaK     | 01.36      | 02.36 |
| AlK     | 00.79      | 01.17 |
| SiK     | 06.47      | 09.20 |
| MoL     | 28.47      | 11.84 |
| SK      | 09.29      | 11.56 |
| CdL     | 31.38      | 11.14 |
| PtL     | 03.37      | 00.69 |
| Matrix  | Correction | ZAF   |

**Fig. S5** EDS of CdS/Pt/Mo<sub>2</sub>C-0.5 sample.

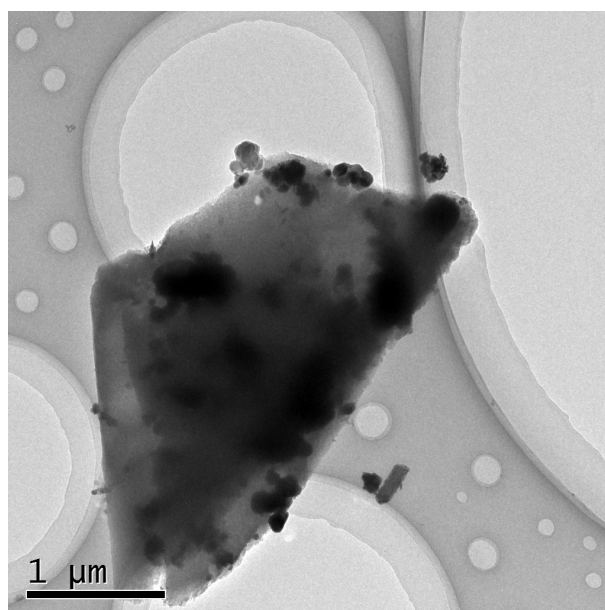

**Fig. S6** TEM of CdS/Pt/Mo<sub>2</sub>C-0.5 sample.

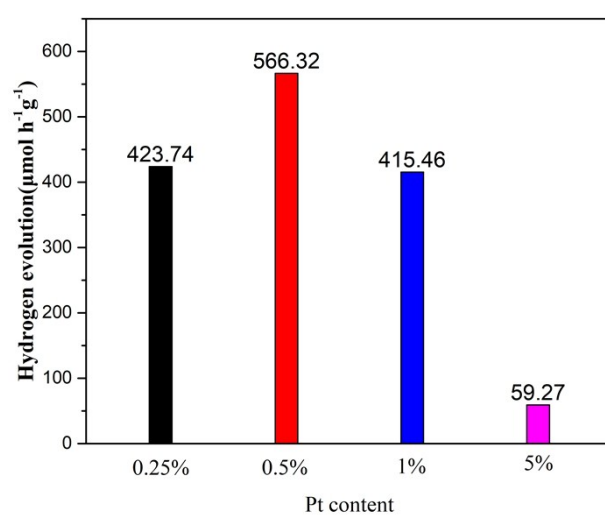

**Fig. S7** H<sub>2</sub> evolution rates on the CdS/Pt photocatalysts with different Pt content.

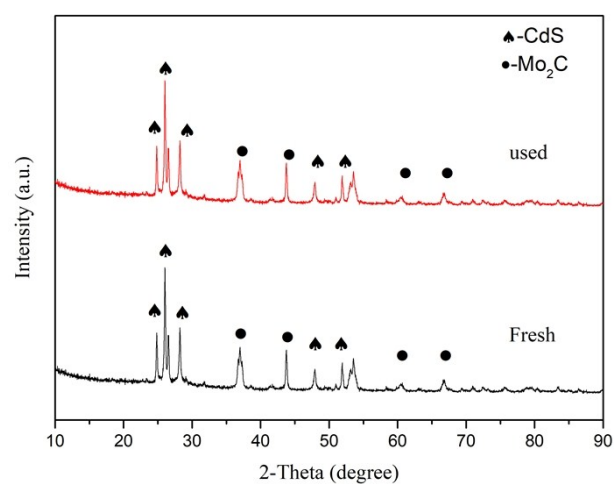

**Fig. S8.** Comparison on the XRD patterns of the fresh and used CdS/Pt/Mo<sub>2</sub>C-0.5 after 4 runs of cycling test.

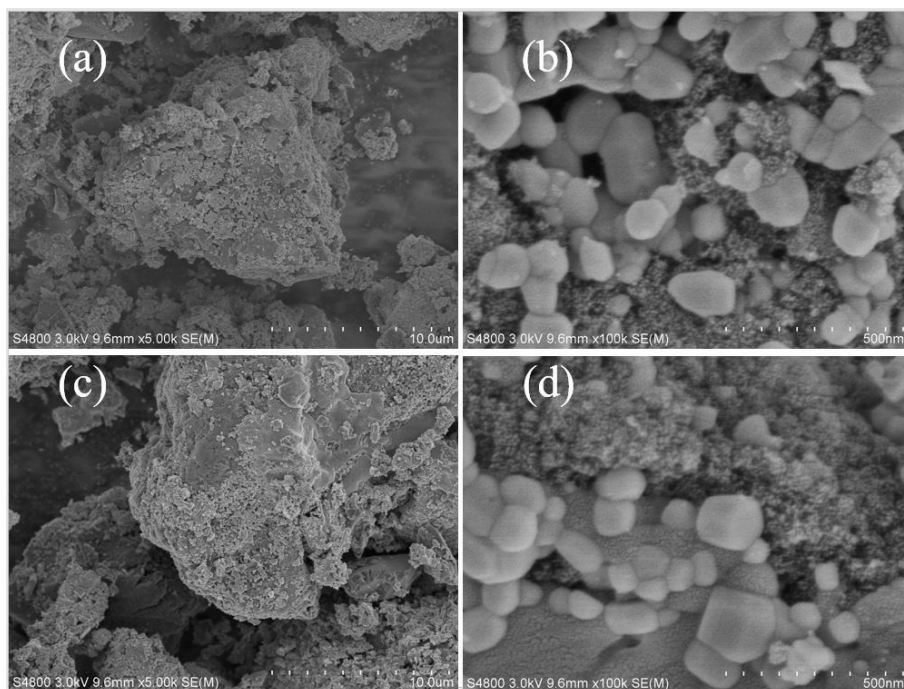

**Fig. S9.** Comparison on SEM images of the fresh (a and b), and used CdS/Pt/Mo<sub>2</sub>C-0.5 after 4 (c and d) runs of cycling tests
